# Supplementary material for: Multi-Omics Approaches to Improve Clubroot Resistance in Brassica with a Special Focus on Brassica oleracea L.
Source: MDPI journal article supplement (doi:10.3390/ijms23169280), 2022-08-17
Supplement: s1 [file s1]

**Table S1.** List of resistance genes/QTLs associated with clubroot diseases in related *Brassica* spp.

| Species                                 | Mapping population | Pathotype/Race/Isolate                           | Gene locus/QTL | Chr/LG | Reference |
|-----------------------------------------|--------------------|--------------------------------------------------|----------------|--------|-----------|
| <i>B. rapa</i>                          | F2:3, BC1          | Race 2                                           | <i>CRa</i>     | A03    | [144]     |
| <i>B. rapa</i> subsp. <i>pekinensis</i> | F2, F3             | Race 6                                           | <i>CR6a</i>    | G1     | [371]     |
|                                         |                    |                                                  | <i>CR6b</i>    | G3     |           |
| <i>B. rapa</i>                          | F2                 | Isolates Wakayama-01, Ano-01 (pathotype group 4) | <i>Crr1</i>    | A08    | [145]     |
|                                         |                    |                                                  | <i>Crr2</i>    | A01    |           |
| <i>B. rapa</i>                          | F2                 | Isolates Wakayama-01 and Ano-01 (pathotype 4)    | <i>Crr4</i>    | A06    | [146]     |
| <i>B. rapa</i>                          | F2:3               | Isolate Ano-01                                   | <i>Crr3</i>    | A03    | [372,95]  |
| <i>B. rapa</i>                          | F2, BC             | Race 2                                           | <i>CRa</i>     | A03    | [373]     |
| <i>B. rapa</i>                          | F2                 | Isolates M85 and K04                             | <i>CRa</i> ,   | A03    | [147]     |
|                                         |                    |                                                  | <i>CRk</i>     | A03    |           |
|                                         |                    |                                                  | <i>CRc</i>     | A02    |           |
| <i>B. rapa</i>                          | F2                 | Race 4                                           | <i>Pb-Br3</i>  | A03    | [374]     |
|                                         |                    |                                                  | <i>Pb-Br8</i>  | A08    |           |

|                                         |                |                                       |                                                   |     |              |
|-----------------------------------------|----------------|---------------------------------------|---------------------------------------------------|-----|--------------|
| <i>B. rapa</i>                          | F2             | Race 2                                | <i>CRa</i>                                        | A03 | [121]        |
| <i>B. rapa</i>                          | F2             | Race 4, Pathotypes 3                  | <i>CRb</i>                                        | A03 | [97,375,96], |
| <i>B. rapa</i> spp.<br><i>chinensis</i> | BC1            | pathotype 3                           | <i>RPb1</i>                                       | A03 | [376]        |
| <i>B. rapa</i>                          | F2             | Isolate Ano-01<br>(pathotype group 4) | <i>Crr1a, Crr1b</i>                               | A08 | [120]        |
| <i>B. rapa</i>                          | BC1F2          | pathotypes 2, 4, 7, and<br>10         | <i>PbBa1.1</i>                                    | A01 | [377]        |
|                                         |                |                                       | <i>PbBa3.1</i>                                    | A03 |              |
|                                         |                |                                       | <i>PbBa8.1</i>                                    | A08 |              |
|                                         |                |                                       | <i>PbBa3.2</i>                                    | A03 |              |
|                                         |                |                                       | <i>PbBa3.3</i>                                    | A03 |              |
| <i>B. rapa</i>                          | F2             | Pathotype 4                           | <i>CRa, CRb,</i><br>and <i>CRb<sup>Kato</sup></i> | A03 | [98]         |
| <i>B. rapa</i>                          | BC1            | Pathotype 3                           | <i>Rcr1</i>                                       | A03 | [99]         |
| <i>B. rapa</i>                          | F <sub>2</sub> | Race 4                                | <i>QS_B1.1</i>                                    | A01 | [378]        |
|                                         |                |                                       | <i>QS_B3.1</i>                                    | A03 |              |
|                                         |                |                                       | <i>QS_B8.1</i>                                    | A08 |              |

|                                          |        |                                          |                                        |     |       |
|------------------------------------------|--------|------------------------------------------|----------------------------------------|-----|-------|
| <i>B. rapa</i>                           | F2     | Pathotypes 2, 5 and 6                    | <i>Rcr1</i>                            | A03 | [104] |
| <i>B. rapa</i>                           | BC1    | pathotypes 2, 3, 5, 6, 8<br>pathotype 5x | <i>Rcr4</i>                            | A03 | [111] |
|                                          |        |                                          | <i>Rcr8</i>                            | A02 |       |
|                                          |        |                                          | <i>Rcr9</i>                            | A08 |       |
| <i>B. rapa</i>                           | F2     | Pathotype 3                              | <i>Rcr2</i>                            | A03 | [105] |
| <i>B. rapa</i>                           | BC1    | -                                        | <i>CrrA5</i>                           | A05 | [379] |
| <i>B. rapa</i><br><i>ssp. pekinensis</i> | F2     | Race 4                                   | <i>Crd</i>                             | A03 | [112] |
| <i>B. rapa</i>                           | BC1    | Canadian field<br>isolates               | <i>BraA.CR.a</i> ,<br><i>BraA.CR.c</i> | A03 | [380] |
|                                          |        |                                          | <i>BraA.CR.b</i> ,                     | A08 |       |
| <i>B. rapa</i>                           | F2     | Pathotype 3                              | <i>Rcr5</i>                            | A03 | [108] |
| <i>B. rapa</i>                           | F2     | pathotype 4                              | <i>CRs</i>                             | A08 | [113] |
| <i>B. rapa</i>                           | F2     | Pathotype 4                              | <i>CRs</i>                             | A08 | [113] |
| <i>B. rapa</i>                           | F2, BC | Pathotype 3                              | <i>Rcr6</i>                            | A08 | [107] |
| <i>B. rapa</i>                           | BC1    | Pathotypes 3H and 5X                     | <i>Rcr3</i> , <i>Rcr9<sup>wa</sup></i> | A08 | [109] |
| <i>B. rapa</i>                           | DH     | pathotype “Banglim”                      | <i>PbBrA08<sup>Banglim</sup></i>       | A08 | [114] |
|                                          | F2     | Pathotypes 3H,                           | <i>CRa/CRbKato</i>                     | A03 | [150] |

|                                                   |                                      |                                                     |                          |                                      |       |
|---------------------------------------------------|--------------------------------------|-----------------------------------------------------|--------------------------|--------------------------------------|-------|
| <i>B. rapa</i> subsp. <i>rapifera</i>             |                                      | 5X and 5G                                           | <i>Crr1</i>              | A08                                  |       |
| <i>B. campestris</i> ssp. <i>Chinensis</i> Makino | F2                                   | Race 7                                              | <i>qBrCR38-1</i>         | A07                                  | [381] |
|                                                   |                                      |                                                     | <i>qBrCR38-2</i>         | A08                                  |       |
| <i>B. napus</i>                                   | DH                                   | Pb137–522 and K92–16                                | <i>Pb-Bn1</i> (DY4)      | DY4                                  | [382] |
|                                                   |                                      |                                                     | Two QTLs                 | <i>DY4, DY15</i>                     |       |
| <i>B. napus</i>                                   | DH                                   | Isolates Korporal, K, 01.07, 1, 01:60, e4x04, and a | Nineteen QTLs            | N02, N03, N08, N13, N15, N16 and N19 | [151] |
| <i>B. napus</i>                                   | DH                                   | Pathotype 3                                         | <i>CRa</i> or <i>CRb</i> | A03                                  | [383] |
| <i>Brassica napus</i> var. <i>napobrassica</i>    | DH                                   | Pathotypes 2, 3, 5, 6, and 8                        | <i>QTL</i>               | A08                                  | [303] |
| <i>B. napus</i>                                   | DH                                   | Pathotype 3                                         | <i>CRa</i>               | A3                                   | [384] |
| <i>B. napus</i>                                   | Association mapping population (472) | Pathotype 4                                         | <i>MCR-C3</i>            | C03                                  | [385] |
|                                                   |                                      |                                                     | <i>MCR-C9</i>            | C09                                  |       |
|                                                   |                                      |                                                     | <i>MCR-A4</i>            | A04                                  |       |
|                                                   |                                      |                                                     | <i>MCR-C3</i>            | C03                                  |       |
|                                                   |                                      |                                                     | <i>SCR-A10a</i>          | A10                                  |       |

|                 |                                       |                         |                             |                                 |       |
|-----------------|---------------------------------------|-------------------------|-----------------------------|---------------------------------|-------|
|                 |                                       |                         | SCR-C6                      | C06                             |       |
|                 |                                       |                         | SCR-A10b                    | A10                             |       |
|                 |                                       |                         | SCR-C3                      | C03                             |       |
|                 |                                       |                         | SCR-C4a                     | C04                             |       |
|                 |                                       |                         | SCR-C4b                     | C04                             |       |
| <i>B. napus</i> | DH                                    | Isolates eH and K92-16. | 20 QTLs<br>(Isolate eH)     | A05, A07, C01,<br>C02, C03, C09 | [386] |
|                 |                                       |                         | 13 QTLs<br>(Isolate K92-16) | A03, A09, C02,<br>C03           |       |
| <i>B. napus</i> | DH                                    | Isolate eH              | 15 QTLs                     | A07, C02, A07                   | [387] |
| <i>B. nigra</i> | F2                                    | Pathotype 3             | <i>Rcr6</i>                 | B03                             | [107] |
| <i>B. napus</i> | Association<br>mapping<br>panel (245) | ECD 17/31/31            | Two major<br>loci           | A02, A03                        | [248] |
| <i>B. napus</i> | DH                                    | Pathotype P1            | C03_19.48                   | C03                             | [388] |
|                 |                                       |                         | C09_58.88                   | C09                             |       |

|                                             |                                                                    |                                                              |                                          |                                            |       |
|---------------------------------------------|--------------------------------------------------------------------|--------------------------------------------------------------|------------------------------------------|--------------------------------------------|-------|
| <i>B. napus</i><br><i>ssp. napobrassica</i> | <i>B. napus</i><br><i>ssp. napobrassica</i><br>accessions<br>(124) | 2F, 3H, 5L, 6M, 8N, 2B,<br>3A, 3O, 5C, 5G, 5K, 5L,<br>and 8P | 45 SNPs,<br>four PCR<br>based<br>markers | A03, A08                                   | [389] |
| <i>B. napus</i>                             | DH                                                                 | Pathotype P1                                                 | <i>PbBn_di_A02</i>                       | A02                                        | [390] |
|                                             |                                                                    |                                                              | <i>PbBn_di_A04</i>                       | A04                                        |       |
|                                             |                                                                    |                                                              | <i>PbBn_di_C03</i>                       | C03                                        |       |
|                                             |                                                                    |                                                              | <i>PbBn_rsp_C03</i>                      | C03                                        |       |
| <i>B. napus</i>                             | DH                                                                 | Field isolate (Lower<br>Silesian Province,<br>Poland)        | <i>Crr3Tsc</i>                           | A03                                        | [116] |
| <i>B. napus</i>                             | <i>B. napus</i><br>accessions<br>(177)                             | pathotypes 5X, 3A, 2B,<br>and 3D                             | 13 SNPs                                  | A01, A03, A04,<br>A05, C03, C07<br>and C09 | [391] |
| <i>B. napus</i>                             | DH                                                                 | pathotypes 3A, 3D, 3H                                        | <i>Rcr10<sup>ECD01</sup></i>             | A03                                        | [117] |
|                                             |                                                                    | pathotypes 3A, 3D, 3H,<br>and 5X                             | <i>Rcr9<sup>ECD01</sup></i>              | A08                                        |       |
